# Supplementary material for: Biomarkers and key pathways in atrial fibrillation associated with mitral valve disease identified by multi-omics study
Source: PubMed Central journal article supplement — Ann Transl Med. 2021 Mar;9(5):393. doi: 10.21037/atm-20-3767 (PMC8033373; doi:10.21037/atm-20-3767), 2021-03
Supplement: atm-09-05-393-rc.pdf [file atm-09-05-393-rc.pdf]

STROBE Statement—Checklist of items that should be included in reports of *observational studies*

Biomarkers and Key Pathways in Atrial Fibrillation Associated with Mitral Valve Disease Identified by Multi-omics Study

Li MY, He GW.

Original Article ATM-20-3767R1 for resubmission to *Annals of Translational Medicine*

|                           | Item No | Recommendation                                                                                                                                                      | Page No/Line No                   | Section/ Paragraph          |
|---------------------------|---------|---------------------------------------------------------------------------------------------------------------------------------------------------------------------|-----------------------------------|-----------------------------|
| <b>Title and abstract</b> | 1       | (a) Indicate the study's design with a commonly used term in the title or the abstract                                                                              | Page 2/Line 3-6                   | Abstract/Paragraph 1        |
|                           |         | (b) Provide in the abstract an informative and balanced summary of what was done and what was found                                                                 | Page 2/Line 7-23 – page 3/Line 25 | Abstract/Paragraph 2-4      |
| <b>Introduction</b>       |         |                                                                                                                                                                     |                                   |                             |
| Background/rationale      | 2       | Explain the scientific background and rationale for the investigation being reported                                                                                | Page 4/Line 27-38                 | Introduction/Paragraph 1-3  |
| Objectives                | 3       | State specific objectives, including any prespecified hypotheses                                                                                                    | Page 4/Line 39-44                 | Introduction/Paragraph 4    |
| <b>Methods</b>            |         |                                                                                                                                                                     |                                   |                             |
| Study design              | 4       | Present key elements of study design early in the paper                                                                                                             | Page 4/Line 47-page 6/Line 83     | Methods/ Paragraph 1-5      |
| Setting                   | 5       | Describe the setting, locations, and relevant dates, including periods of recruitment, exposure, follow-up, and data collection                                     | Page 4/Line 47-page 5/Line 60     | Methods/Paragraph 1         |
| Participants              | 6       | (a) Give the eligibility criteria, and the sources and methods of case ascertainment and control selection. Give the rationale for the choice of cases and controls | Page5/Line48-57                   | Methods/Paragraph 1         |
|                           |         | (b) For matched studies, give matching criteria and the number of controls per case                                                                                 | Page4-5/Line 47-57                | Methods/Paragraph 1         |
| Variables                 | 7       | Clearly define all outcomes, exposures, predictors, potential confounders, and effect modifiers. Give diagnostic criteria, if applicable                            | Page 4-5/Line 47-57<br>Page5/Line | Methods/Paragraph 1,4,5,6,7 |

|                              |     |                                                                                                                                                                                                   |                                                  |                                            |
|------------------------------|-----|---------------------------------------------------------------------------------------------------------------------------------------------------------------------------------------------------|--------------------------------------------------|--------------------------------------------|
|                              |     |                                                                                                                                                                                                   | 63-<br>page6/Line 83                             |                                            |
| Data sources/<br>measurement | 8*  | For each variable of interest, give sources of data and details of methods of assessment (measurement). Describe comparability of assessment methods if there is more than one group              | Page4-<br>5/Line47-57;<br>page 5-6/Line<br>63-83 | Methods/Paragraph 3-<br>5                  |
| Bias                         | 9   | Describe any efforts to address potential sources of bias                                                                                                                                         | Page5/Line<br>48-57                              | Methods/Paragraph 1                        |
| Study size                   | 10  | Explain how the study size was arrived at                                                                                                                                                         | Page4/Line<br>48-50                              | Methods/Paragraph 1                        |
| Quantitative variables       | 11  | Explain how quantitative variables were handled in the analyses. If applicable, describe which groupings were chosen and why                                                                      | Page4/Line<br>48-50<br>Page 6/Line<br>84-88      | Methods/Paragraph 1<br>Methods/Paragraph 7 |
| Statistical methods          | 12  | (a) Describe all statistical methods, including those used to control for confounding                                                                                                             | Page 6/Line<br>84-88                             | Methods/Paragraph 8                        |
|                              |     | (b) Describe any methods used to examine subgroups and interactions                                                                                                                               | Page 5-6/Line<br>63-88                           | Methods/Paragraph 5-<br>7                  |
|                              |     | (c) Explain how missing data were addressed                                                                                                                                                       | No missing<br>data                               | No missing data                            |
|                              |     | (d) If applicable, explain how matching of cases and controls was addressed                                                                                                                       | Page 5/Line<br>48-57                             | Methods/Paragraph 1                        |
|                              |     | (e) Describe any sensitivity analyses                                                                                                                                                             | No sensitivity<br>analyses<br>required           | No sensitivity analyses<br>required        |
| <b>Results</b>               |     |                                                                                                                                                                                                   |                                                  |                                            |
| Participants                 | 13* | (a) Report numbers of individuals at each stage of study—eg numbers potentially eligible, examined for eligibility, confirmed eligible, included in the study, completing follow-up, and analysed | Page 6-7/Line<br>92-97                           | Results/Patient<br>characteristics         |
|                              |     | (b) Give reasons for non-participation at each stage                                                                                                                                              | non-<br>participation<br>not happened            | non-participation not<br>happened          |
|                              |     | (c) Consider use of a flow diagram                                                                                                                                                                | Page 26                                          | Figure 6                                   |
| Descriptive data             | 14* | (a) Give characteristics of study participants (eg demographic,                                                                                                                                   | Page 6-7/                                        | Results/Patient                            |

|                   |     |                                                                                                                                                                                                              |                                 |                                                                                |
|-------------------|-----|--------------------------------------------------------------------------------------------------------------------------------------------------------------------------------------------------------------|---------------------------------|--------------------------------------------------------------------------------|
|                   |     | clinical, social) and information on exposures and potential confounders                                                                                                                                     | Line 92-97                      | characteristics                                                                |
|                   |     | (b) Indicate number of participants with missing data for each variable of interest                                                                                                                          | No missing data                 | No missing data                                                                |
| Outcome data      | 15* | Report numbers in each exposure category, or summary measures of exposure                                                                                                                                    | Page 7-8/Line 98-132            | Results/Proteomics-combined proteomics and metabolomics analysis in chronic AF |
| Main results      | 16  | (a) Give unadjusted estimates and, if applicable, confounder-adjusted estimates and their precision (eg, 95% confidence interval). Make clear which confounders were adjusted for and why they were included | Page 7/Line 93—Page 9 line 144  | Results/Proteomics-Metabolomics analysis in chronic AF                         |
|                   |     | (b) Report category boundaries when continuous variables were categorized                                                                                                                                    | Page 7/Line 98—Page 8 line 132  | Results/Proteomics-Metabolomics analysis in chronic AF                         |
|                   |     | (c) If relevant, consider translating estimates of relative risk into absolute risk for a meaningful time period                                                                                             | No relative risk described      | No relative risk described                                                     |
| Other analyses    | 17  | Report other analyses done—eg analyses of subgroups and interactions, and sensitivity analyses                                                                                                               | Page 8/Line 133-page 9/Line145  | Results/Combined proteomics and metabolomics analysis in chronic AF            |
| <b>Discussion</b> |     |                                                                                                                                                                                                              |                                 |                                                                                |
| Key results       | 18  | Summarise key results with reference to study objectives                                                                                                                                                     | Page 9/Line 150-157             | Discussion/Paragraph 1                                                         |
| Limitations       | 19  | Discuss limitations of the study, taking into account sources of potential bias or imprecision. Discuss both direction and magnitude of any potential bias                                                   | Page 13/Line 236-241            | Discussion/Paragraph 10 (Study Limitations)                                    |
| Interpretation    | 20  | Give a cautious overall interpretation of results considering objectives, limitations, multiplicity of analyses, results from similar studies, and other relevant evidence                                   | Page 9/Line 150-page12/Line 235 | Discussion/Paragraph 1-9                                                       |
| Generalisability  | 21  | Discuss the generalisability (external validity) of the study results                                                                                                                                        | Page13/Line                     | Conclusion/Paragraph 1                                                         |

**Other information**

|         |    |                                                                                                                                                               |                     |                    |
|---------|----|---------------------------------------------------------------------------------------------------------------------------------------------------------------|---------------------|--------------------|
| Funding | 22 | Give the source of funding and the role of the funders for the present study and, if applicable, for the original study on which the present article is based | Page<br>14/Line 258 | Sources of Funding |
|---------|----|---------------------------------------------------------------------------------------------------------------------------------------------------------------|---------------------|--------------------|

\*Give information separately for cases and controls in case-control studies and, if applicable, for exposed and unexposed groups in cohort and cross-sectional studies.

Article information: <http://dx.doi.org/10.21037/atm-20-3767>

\*As the checklist was provided upon initial submission, the page number/line number reported may be changed due to copyediting and may not be referable in the published version. In this case, the section/paragraph may be used as an alternative reference.
